# Supplementary material for: Ratiometric sensing of Zn2+ with a new benzothiazole-based fluorescent sensor and living cell imaging
Source: Royal Society of Chemistry journal article supplement (doi:10.1039/d1an00749a), 2021-01-01
Supplement: d1an00749a1.pdf [file d1an00749a1.pdf]

Electronic Supplementary Information

**Ratiometric sensing of Zn<sup>2+</sup> with a new benzothiazole-based  
fluorescent sensor and living cell imaging**

Qi Wu <sup>a</sup>, LiHen Feng <sup>a</sup>, Jian Bin Chao <sup>b</sup>, Yu Wang <sup>a\*</sup>, Shaomin Shuang <sup>a\*</sup>

<sup>a</sup> School of Chemistry and Chemical Engineering, Shanxi University, Taiyuan 030006, PR China

<sup>b</sup> Scientific Instrument Center, Shanxi University, Taiyuan 030006, PR China

**Fig. S1** <sup>1</sup>H NMR spectrum of probe BTT.

**Fig. S2** <sup>13</sup>C NMR of probe BTT.

**Fig. S3** Mass spectrum in negative-ion mode of probe BTT.

**Fig. S4** Effect of pH on the fluorescence intensity of BTT and BTT-Zn<sup>2+</sup>. [BTT]=4 μM, [Zn<sup>2+</sup>]=8 μM.

**Fig. S5** Time dependent fluorescence intensity of BTT (4 μM) for Zn<sup>2+</sup>. [BTT]=4μM, [Zn<sup>2+</sup>]=8μM.

**Fig. S6** Fluorescence intensity changes of BTT upon alternate addition of Zn<sup>2+</sup> and EDTA. [BTT]= 4μM, [Zn<sup>2+</sup>]=  
4μM, [EDTA]=4μM.

**Fig. S7** Cell cytotoxic effect of BTT on HeLa cells.

---

\* Corresponding authors. Tel.: +86 351 7010588; fax: +86 351 7011688.

E-mail: wangyu1168@sxu.edu.cn (Y. Wang), smshuang@sxu.edu.cn(S.M.Shuang ).

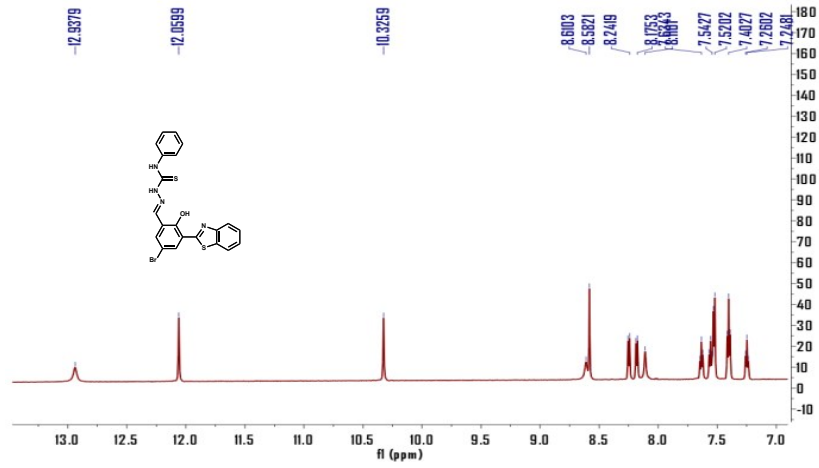

Fig. S1 <sup>1</sup>H NMR spectrum of probe BTT.

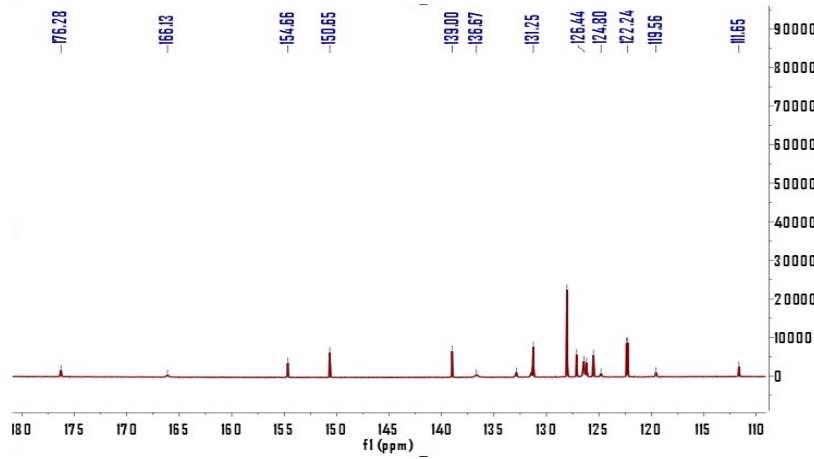

Fig. S2 <sup>13</sup>C NMR of probe BTT.

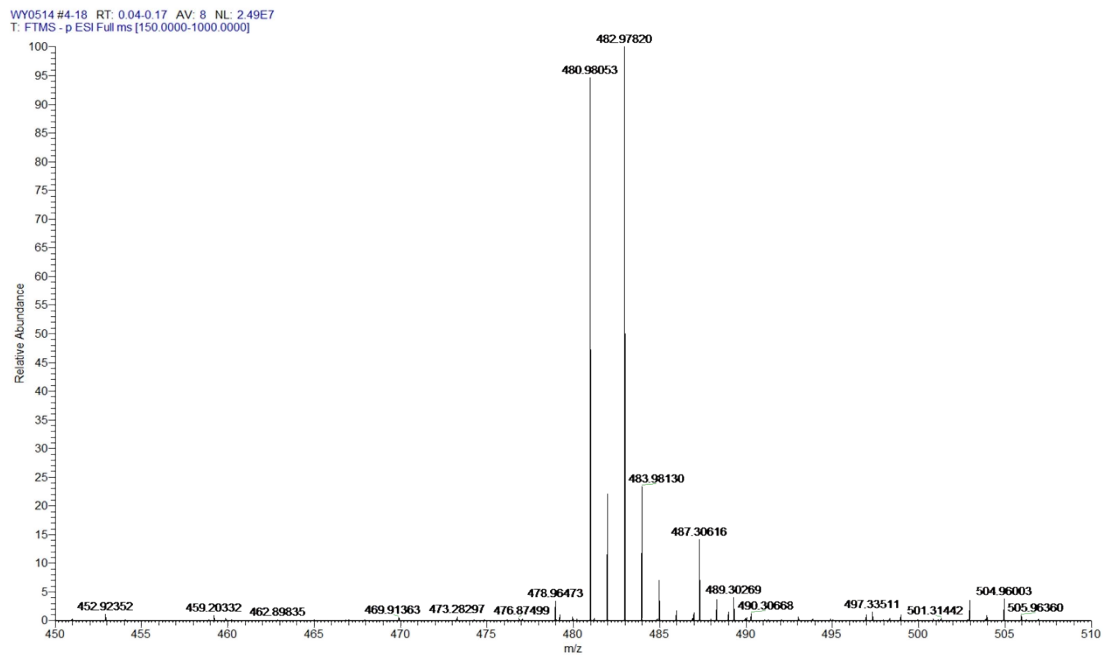

Fig. S3 Mass spectrum in negative-ion mode of probe BTT.

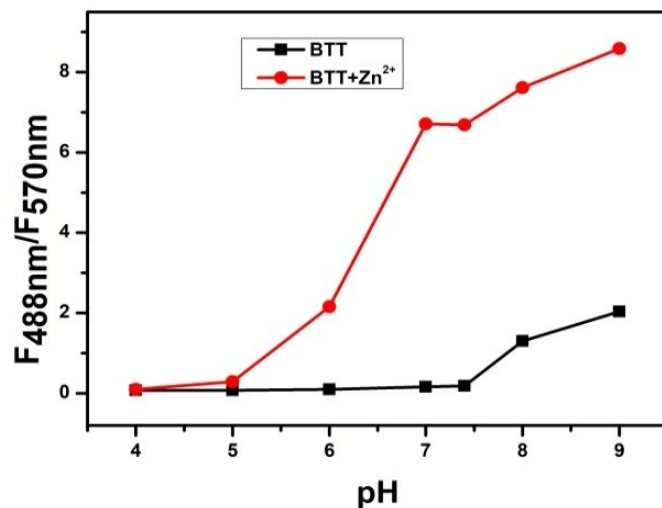

Fig. S4 Effect of pH on the fluorescence intensity of BTT and BTT-Zn<sup>2+</sup>. [BTT]=4μM, [Zn<sup>2+</sup>]=8μM.

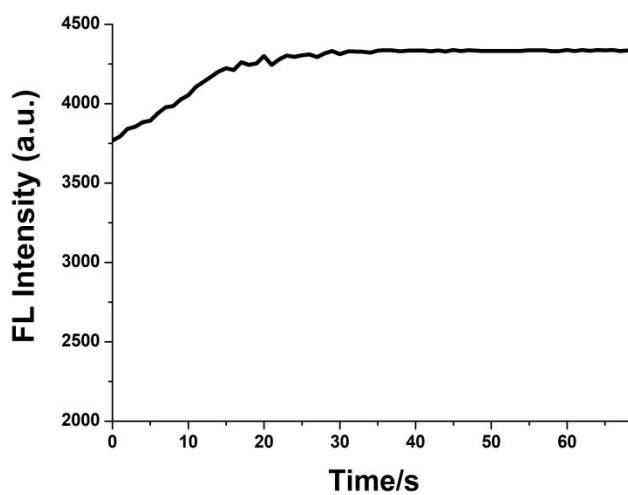

Fig. S5 Time dependent fluorescence intensity of BTT (4 μM) for Zn<sup>2+</sup>. [BTT]=4μM, [Zn<sup>2+</sup>]=8μM.

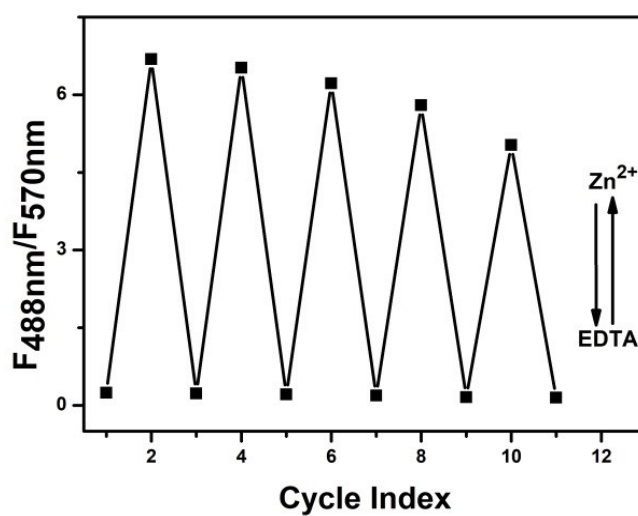

Fig. S6 Fluorescence intensity changes of BTT upon alternate addition of Zn<sup>2+</sup> and EDTA. [BTT]= 4μM, [Zn<sup>2+</sup>]= 4μM, [EDTA]=4μM.

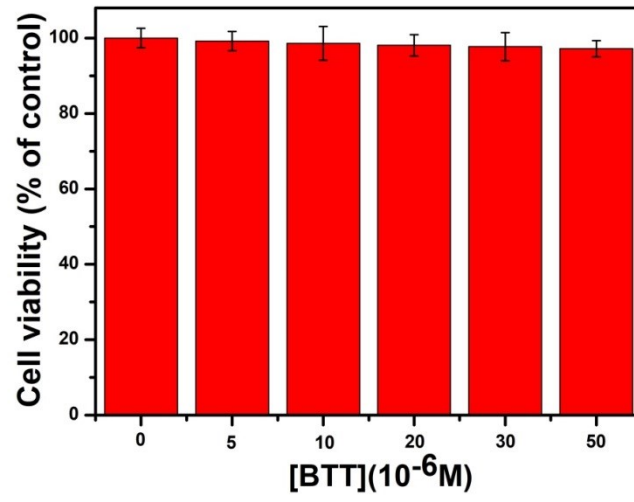

Fig. S7 Cell cytotoxic effect of BTT on HeLa cells. Values are the mean  $\pm$  s.d. For n = 5.
